# Supplementary material for: Shaving and breaking bacterial chains with a viscous flow
Source: Royal Society of Chemistry journal article supplement (doi:10.1039/d0sm00292e), 2020-01-01
Supplement: d0sm00292e2.xlsx [file d0sm00292e2.xlsx]

## Sheet: ESI 1 - LGG WT
Type of chains	Control	Error	P = 0 bar	Error	P = 0.2 bars	Error	P = 0.4 bars	Error	P = 0.6 bars	Error	P = 1 bar	Error	P = 4 bars (punctual)	Error	P = 4 bars (repeated 3 times)	Error
single cell	0	0	0	0	3.87565	1.17515	8.08498	2.09857	10.1803	1.59938	10.7166	2.37526	22.401	1.66703	38.0612	2.0103
2-cell	4.84534	1.55349	4.98611	1.37647	56.8693	3.63366	48.7868	3.21147	65.1986	2.43081	57.8914	3.54679	55.0197	1.99797	47.4477	2.3921
3-cell	1.96476	1.00362	2.15517	1.27326	5.96333	1.51406	6.19817	1.67916	4.95742	1.22539	5.16809	1.40105	3.36927	0.449733	1.37003	0.426151
4-cell	12.5376	2.42615	10.3047	2.45933	18.9056	3.83901	6.04978	1.2268	11.2164	1.64638	6.34169	1.74326	2.65416	0.506681	1.63371	0.349671
5-cell	4.31175	1.32813	4.69854	1.47728	2.52513	0.789825	1.55993	0.751944	0.547667	0.380417	1.55869	0.8963	0.501009	0.20479	0	0
6-cell	8.97671	1.91206	10.5686	1.93137	2.11288	1.00037	1.76975	0.885727	0.47619	0.319642	2.0296	0.810263	0.198115	0.137058	0.0801925	0.0774733
7-cell	6.193	1.93465	4.44287	1.33009	0.492611	0.475907	0.431034	0.416419	0.181488	0.175334	0.431034	0.416419	0.137931	0.133254	0	0
8-cell	8.58133	2.05249	6.60783	1.43253	0.31348	0.30285	0.246305	0.237954	0	0	0	0	0.0931966	0.0900365	0	0
9-cell	1.92157	1.00362	5.53914	1.76842	0	0	0	0	0	0	0	0	0	0	0	0
10-cell	3.87307	1.50242	2.08949	0.872647	0.383142	0.37015	0	0	0	0	0	0	0	0	0	0
> 10-cell	23.8903	3.24395	29.0271	4.72327	0	0	0	0	0	0	0	0	0	0	0	0
Flocs	22.9046	2.25487	19.5804	3.63364	8.5589	1.82641	26.8733	3.85736	7.24183	1.67425	15.8629	2.48649	15.6256	1.96523	11.4072	2.22097
ESI 1: Lactobacillus rhamnosus GG "wild type" chain distribution (% by type of chains) before and after spray-drying for air pressures ranging from 0 to 4 bars; standard errors are presented
(at P=0 bars, bacterial suspension gets through the nozzle when no air pressure is applied)

## Sheet: ESI 2 - LGG spaCBA
Type of chains	Control	Error	P = 0 bar	Error	P = 0.2 bars	Error	P = 0.4 bars	Error	P = 0.6 bars	Error	P = 1 bar	Error	P = 4 bars (punctual)	Error	P = 4 bars (repeated 3 times)	Error
single cell	1.24869	0.529208	1.11785	0.517451	4.30341	0.861229	5.3032	0.823923	9.41712	1.21359	14.5621	1.47363	16.4967	1.29037	35.6889	1.0882
2-cell	6.72932	1.21817	9.27751	1.13323	34.3682	1.97719	44.841	2.7787	45.217	1.54604	52.1535	1.61973	47.5886	1.47393	43.2219	1.0519
3-cell	2.08542	0.580763	3.21791	0.819569	11.9873	1.59638	10.1684	1.39542	8.0133	0.997542	7.13645	0.551512	4.99179	0.430393	3.41618	0.30895
4-cell	6.25356	1.14622	9.96439	1.41761	19.5426	1.46133	15.0538	1.77152	10.565	0.604394	8.75913	0.772581	5.80369	0.706568	1.67744	0.292978
5-cell	2.98997	0.901693	3.5421	0.785261	3.53775	0.651995	1.71624	0.500929	2.06748	0.382947	1.19825	0.274507	0.869355	0.254547	0.140066	0.0764771
6-cell	3.68253	0.947058	7.14233	0.992979	2.53383	0.765196	4.3623	0.833891	1.11999	0.282363	1.20803	0.291918	0.401326	0.160554	0.0415455	0.0401368
7-cell	3.79406	0.859443	3.08708	0.922915	1.52757	0.412521	1.07734	0.511449	0.439125	0.189134	0.265072	0.14053	0	0	0	0
8-cell	7.74005	1.51526	4.96915	0.9863	0.784454	0.308464	0.846809	0.376112	0.177407	0.0964388	0.0328407	0.0317272	0	0	0	0
9-cell	2.16769	0.644224	4.06564	0.724053	0	0	0	0	0	0	0.100287	0.0673959	0	0	0	0
10-cell	5.13118	1.01059	2.41795	0.637829	0	0	0	0	0	0	0	0	0	0	0	0
> 10-cell	26.5946	2.99696	17.4008	1.99792	0	0	0.172414	0.166568	0	0	0	0	0	0	0	0
Flocs	31.5829	2.71152	33.7973	1.59967	21.4149	1.43703	16.4584	1.26988	22.9835	1.18936	14.5844	1.33289	23.8485	1.22257	15.814	0.651199
ESI 2: Lactobacillus rhamnosus GG spaCBA chain distribution (% by type of chains) before and after spray-drying for air pressures ranging from 0 to 4 bars; standard errors are presented
(at P=0 bars, bacterial suspension gets through the nozzle when no air pressure is applied)

## Sheet: ESI 3 - LGG welE
Type of chains	Control	Error	P = 0 bar	Error	P = 0.2 bars	Error	P = 0.4 bars	Error	P = 0.6 bars	Error	P = 1 bar	Error	P = 4 bars (punctual)	Error	P = 4 bars (repeated 3 times)	Error
single cell	0.181488	0.175334	1.21546	0.577334	5.46443	0.731502	7.04217	1.36368	15.3315	1.94337	22.2356	2.04678	17.9094	1.80062	51.968	2.43333
2-cell	9.33432	1.37605	22.9107	2.57066	48.803	1.32281	60.5013	2.56737	56.3875	2.12324	53.6843	2.38117	57.9878	1.76547	33.4732	2.01734
3-cell	3.99423	1.05921	4.97848	1.10909	6.96463	0.904529	8.01746	1.18417	9.1053	1.20397	4.22431	0.638656	3.71703	0.68302	2.85529	0.88949
4-cell	11.5168	1.3376	13.949	1.19281	13.3019	0.836871	13.5316	1.3579	10.2577	1.49015	4.40046	0.619176	3.63325	0.546002	0.331413	0.223399
5-cell	3.86982	0.797641	3.40083	0.838717	2.60203	0.435832	1.51033	0.454201	2.30342	0.922522	0.707654	0.281399	0.453007	0.168361	0	0
6-cell	8.00283	1.33939	6.68073	1.04138	2.69366	0.558168	2.12732	0.676975	1.63338	0.512416	0.52612	0.239508	0.193933	0.0928756	0	0
7-cell	3.60304	0.920183	5.15808	0.913323	0.978315	0.290859	0.502874	0.341015	0	0	0.270936	0.224205	0.0338066	0.0326603	0.070373	0.0679868
8-cell	7.23284	1.51271	5.21862	0.707496	0.242586	0.112404	0.118906	0.114874	0	0	0	0	0.137931	0.133254	0	0
9-cell	4.2932	0.893615	2.33053	0.619339	0.330575	0.158247	0	0	0	0	0	0	0.143678	0.138806	0	0
10-cell	5.70416	1.36948	4.71269	0.858103	0.066313	0.0640644	0	0	0	0	0	0	0	0	0	0
> 10-cell	25.3337	2.67734	14.9367	1.40247	0	0	0	0	0	0	0	0	0.548589	0.529988	0	0
Flocs	16.9336	1.47743	14.5083	1.83691	18.5526	1.03197	6.64805	0.98895	4.98119	0.919778	13.9506	1.91769	15.2415	1.52092	11.3018	1.02958
ESI 3: Lactobacillus rhamnosus GG welE chain distribution (% by type of chains) before and after spray-drying for air pressures ranging from 0 to 4 bars; standard errors are presented
(at P=0 bars, bacterial suspension gets through the nozzle when no air pressure is applied)

## Sheet: ESI 4 - Maxf
	2 ellipsoids		3 ellipsoids			4 ellipsoids				5 ellipsoids
Time	left	right	left	middle	right	left	middle left	middle right	right	left	middle left	middle	middle right	right
0	2.49001	2.49001	2.48594	2.4284	2.48594	2.48454	2.42253	2.42253	2.48454	2.4839	2.42075	2.4166	2.42075	2.4839
0.25	2.80075	2.80075	2.8064	2.75564	2.8064	2.79084	2.77035	2.77035	2.79084	2.79091	2.76054	2.76604	2.76053	2.79091
0.5	2.84077	2.84077	2.84792	2.74391	2.84792	2.83843	2.76295	2.76295	2.83843	2.83296	2.76288	2.7623	2.76288	2.83296
0.75	2.88279	2.88279	2.8796	2.74242	2.8796	2.87316	2.75651	2.75651	2.87316	2.86662	2.76518	2.75694	2.76518	2.86662
1	2.928	2.928	2.91093	2.74193	2.91093	2.90237	2.75038	2.75038	2.90237	2.89666	2.76488	2.75304	2.76488	2.89666
1.25	2.97654	2.97654	2.94305	2.74147	2.94305	2.9294	2.74763	2.74763	2.9294	2.92434	2.76261	2.75028	2.76261	2.92434
1.5	3.02897	3.02897	2.97586	2.74095	2.97586	2.95536	2.75261	2.75261	2.95536	2.95005	2.75891	2.74831	2.75891	2.95005
1.75	3.08734	3.08734	3.01017	2.74033	3.01017	2.98178	2.75793	2.75793	2.98178	2.97514	2.7542	2.74688	2.7542	2.97514
2	3.15135	3.15135	3.04578	2.73962	3.04578	3.00853	2.76342	2.76342	3.00853	2.9996	2.74876	2.74583	2.74876	2.9996
2.25	3.22158	3.22158	3.08297	2.73881	3.08297	3.03579	2.769	2.769	3.03579	3.02374	2.75051	2.74504	2.75051	3.02374
2.5	3.30077	3.30077	3.1221	2.73789	3.1221	3.06371	2.77464	2.77464	3.06371	3.0478	2.75656	2.74442	2.75656	3.0478
2.75	3.38831	3.38831	3.16269	2.73686	3.16269	3.09243	2.78034	2.78034	3.09243	3.07198	2.76287	2.74392	2.76287	3.07198
3	3.48703	3.48703	3.20641	2.73571	3.20641	3.12208	2.78608	2.78608	3.12208	3.09643	2.76939	2.74349	2.76939	3.09643
3.25	3.59379	3.59379	3.25257	2.73442	3.25257	3.15278	2.79188	2.79188	3.15278	3.12129	2.77608	2.74312	2.77608	3.12129
3.5	3.71473	3.71473	3.30161	2.73299	3.30161	3.18475	2.79773	2.79773	3.18475	3.14667	2.78291	2.74277	2.78291	3.14667
3.75	3.85006	3.85006	3.35433	2.73139	3.35433	3.21715	2.80366	2.80366	3.21715	3.17271	2.78987	2.74243	2.78987	3.17271
4	3.99921	3.99921	3.40955	2.72961	3.40955	3.2517	2.80965	2.80965	3.2517	3.1995	2.79694	2.7421	2.79694	3.1995
4.25	4.16891	4.16891	3.47021	2.72764	3.47021	3.28761	2.81573	2.81573	3.28761	3.22614	2.80413	2.74176	2.80413	3.22614
4.5	4.35863	4.35863	3.53503	2.72507	3.53503	3.3251	2.8219	2.8219	3.3251	3.25445	2.81142	2.74141	2.81142	3.25445
4.75	4.57162	4.57162	3.60487	2.72262	3.60487	3.3644	2.82816	2.82816	3.3644	3.28357	2.81882	2.74104	2.81882	3.28357
5	4.80938	4.80938	3.68075	2.71987	3.68075	3.40578	2.83454	2.83454	3.40578	3.31361	2.82633	2.74066	2.82633	3.31361
5.25	5.07961	5.07961	3.76061	2.71678	3.76061	3.44962	2.84103	2.84103	3.44962	3.34468	2.83397	2.74025	2.83397	3.34468
5.5	5.38204	5.38204	3.8497	2.71329	3.8497	3.49412	2.84764	2.84764	3.49412	3.37691	2.84172	2.73982	2.84172	3.37691
5.75	5.72011	5.72011	3.94579	2.70935	3.94579	3.54262	2.85439	2.85439	3.54262	3.41045	2.84961	2.73936	2.84961	3.41045
6	6.09237	6.09237	4.05009	2.70489	4.05009	3.59363	2.86129	2.86129	3.59363	3.44548	2.85764	2.73887	2.85764	3.44548
6.25	6.49445	6.49445	4.16415	2.6998	4.16415	3.64751	2.86835	2.86835	3.64751	3.4822	2.86581	2.73834	2.86581	3.4822
6.5	6.90686	6.90686	4.28988	2.69399	4.28988	3.70467	2.87559	2.87559	3.70467	3.51854	2.87414	2.73778	2.87414	3.51854
6.75	7.28423	7.28423	4.42333	2.68732	4.42333	3.76563	2.883	2.883	3.76563	3.55818	2.88264	2.73718	2.88264	3.55818
7	7.53454	7.53454	4.57361	2.67963	4.57361	3.83102	2.89062	2.89062	3.83102	3.59942	2.89132	2.73653	2.89132	3.59942
7.25	7.48249	7.48249	4.73852	2.67071	4.73852	3.89743	2.89845	2.89845	3.89743	3.64245	2.90018	2.73584	2.90018	3.64245
7.5	6.85478	6.85478	4.92049	2.66031	4.92049	3.97106	2.90614	2.90614	3.97106	3.68747	2.90925	2.7351	2.90925	3.68747
7.75	5.39277	5.39277	5.12238	2.64809	5.12238	4.04934	2.91445	2.91445	4.04934	3.7347	2.91854	2.73431	2.91854	3.7347
8	3.41527	3.41527	5.34826	2.63361	5.34826	4.13287	2.92301	2.92301	4.13287	3.78441	2.92805	2.73346	2.92805	3.78441
8.25	3.37614	3.37614	5.59465	2.61637	5.59465	4.22235	2.93184	2.93184	4.22235	3.83693	2.93782	2.73254	2.93782	3.83693
8.5	5.35142	5.35142	5.87425	2.5956	5.87425	4.31866	2.94096	2.94096	4.31866	3.89265	2.94784	2.73156	2.94784	3.89265
8.75	6.8358	6.8358	6.18682	2.57038	6.18682	4.42278	2.95038	2.95038	4.42278	3.94762	2.95814	2.7305	2.95814	3.94762
9	7.48045	7.48045	6.53809	2.5382	6.53809	4.53601	2.96011	2.96011	4.53601	4.00873	2.96874	2.72936	2.96874	4.00873
9.25	7.54033	7.54033	6.93391	2.49949	6.93391	4.65196	2.97019	2.97019	4.65196	4.07299	2.97967	2.72813	2.97967	4.07299
9.5	7.29026	7.29026	7.37463	2.45079	7.37463	4.7823	2.9806	2.9806	4.7823	4.14072	2.99056	2.7268	2.99056	4.14072
9.75	6.91068	6.91068	7.86909	2.38875	7.86909	4.92319	2.99137	2.99137	4.92319	4.21229	3.00219	2.72536	3.00219	4.21229
10	6.49514	6.49514	8.41314	2.30932	8.41314	5.07617	3.0025	3.0025	5.07617	4.28814	3.01421	2.7238	3.01421	4.28814
10.25	6.0899	6.0899	8.99688	2.20762	8.99688	5.24293	3.01398	3.01398	5.24293	4.36876	3.02664	2.7221	3.02664	4.36876
10.5	5.71607	5.71607	9.58568	2.08002	9.58568	5.42543	3.0258	3.0258	5.42543	4.45474	3.0395	2.72026	3.0395	4.45474
10.75	5.37439	5.37439	10.1066	1.93086	10.1066	5.62627	3.03792	3.03792	5.62627	4.54679	3.05284	2.71826	3.05284	4.54679
11	5.07028	5.07028	10.3983	1.81054	10.3983	5.84232	3.05029	3.05029	5.84232	4.64015	3.06667	2.71607	3.06667	4.64015
11.25	4.79869	4.79869	10.1613	1.93776	10.1613	6.08467	3.0628	3.0628	6.08467	4.74422	3.08104	2.71367	3.08104	4.74422
11.5	4.56002	4.56002	8.93444	2.24364	8.93444	6.35217	3.0753	3.0753	6.35217	4.85521	3.09598	2.71105	3.09598	4.85521
11.75	4.34627	4.34627	6.33174	2.56996	6.33174	6.6486	3.08757	3.08756	6.64861	4.97376	3.11153	2.70816	3.11153	4.97376
12	4.15652	4.15652	3.20487	2.73586	3.20488	6.97815	3.09923	3.09923	6.97816	5.10087	3.12772	2.70498	3.12772	5.10087
12.25	3.98658	3.98658	4.78701	2.66402	4.78703	7.34634	3.10975	3.10975	7.34634	5.23749	3.1446	2.70147	3.1446	5.23749
12.5	3.83764	3.83764	7.92653	2.37498	7.92653	7.75926	3.11828	3.11828	7.75927	5.38485	3.16219	2.69758	3.16219	5.38485
12.75	3.70277	3.70277	9.77497	2.03233	9.77497	8.21876	3.1223	3.1223	8.21876	5.54426	3.18058	2.69325	3.18058	5.54426
13	3.58223	3.58223	10.3954	1.8201	10.3954	8.73727	3.12201	3.12201	8.73728	5.7175	3.19973	2.68843	3.19973	5.7175
13.25	3.47592	3.47592	10.2841	1.88354	10.2841	9.31691	3.11322	3.11322	9.31692	5.90628	3.21978	2.68303	3.21978	5.90628
13.5	3.37852	3.37852	9.82556	2.03348	9.82556	9.96126	3.09102	3.09102	9.96126	6.10558	3.24065	2.67697	3.24065	6.10558
13.75	3.29202	3.29202	9.24009	2.17022	9.24009	10.6688	3.04737	3.04736	10.6688	6.32844	3.2624	2.67014	3.2624	6.32844
14	3.21525	3.21525	8.63685	2.28127	8.63685	11.4203	2.96982	2.96982	11.4203	6.57219	3.28501	2.66241	3.28501	6.57219
14.25	3.14505	3.14505	8.06394	2.36848	8.06394	12.1679	2.8391	2.8391	12.1679	6.83974	3.30844	2.65363	3.30844	6.83974
14.5	3.08241	3.08241	7.5401	2.43653	7.5401	12.8006	2.62332	2.62332	12.8006	7.13455	3.33263	2.64362	3.33263	7.13455
14.75	3.02607	3.02607	7.07145	2.48986	7.07145	13.0905	2.38877	2.38877	13.0905	7.4608	3.35738	2.63216	3.35738	7.4608
15	2.97447	2.97447	6.65069	2.53199	6.65069	12.6202	2.84032	2.84032	12.6202	7.82335	3.38244	2.61899	3.38244	7.82335
15.25	2.92723	2.92723	6.27788	2.56558	6.27788	10.7709	3.19894	3.19896	10.7708	8.22829	3.40728	2.60328	3.40728	8.22829
15.5	2.88358	2.88358	5.9468	2.59377	5.9468	7.0799	3.22593	3.22594	7.07985	8.67658	3.43125	2.58576	3.43125	8.67658
15.75	2.84249	2.84249	5.65157	2.61585	5.65157	2.94876	2.79961	2.79962	2.94874	9.18239	3.45318	2.56554	3.45318	9.18239
16	2.80356	2.80356	5.39199	2.63408	5.39199	6.31822	3.15054	3.15052	6.31827	9.74977	3.47129	2.54231	3.47129	9.74977
16.25	2.76618	2.76618	5.15534	2.64921	5.15534	10.3475	3.12313	3.12312	10.3476	10.385	3.48349	2.51585	3.48349	10.385
16.5	2.80009	2.80009	4.94383	2.66198	4.94383	12.4951	2.78774	2.78774	12.4951	11.0926	3.48574	2.48628	3.48574	11.0926
16.75	2.84009	2.84009	4.75449	2.67276	4.75449	13.109	2.36362	2.36362	13.109	11.8638	3.4719	2.45439	3.4719	11.8638
17	2.88206	2.88206	4.58329	2.68195	4.58329	12.8621	2.66799	2.66799	12.8621	12.6725	3.43679	2.42216	3.43679	12.6725
17.25	2.92722	2.92722	4.42776	2.68984	4.42776	12.2245	2.8932	2.8932	12.2245	13.4286	3.37585	2.39302	3.37585	13.4286
17.5	2.97571	2.97571	4.28987	2.69663	4.28987	11.4551	3.03347	3.03347	11.4551	13.9366	3.28442	2.36971	3.28442	13.9366
17.75	3.02883	3.02883	4.16109	2.70252	4.16109	10.6785	3.11609	3.11609	10.6785	13.81	3.17135	2.3438	3.17135	13.81
18	3.0863	3.0863	4.04461	2.70765	4.04461	9.94673	3.16298	3.16298	9.94673	12.5523	3.81442	2.27688	3.81442	12.5523
18.25	3.15021	3.15021	3.93837	2.71213	3.93837	9.28099	3.18711	3.18711	9.28099	10.0302	4.86593	2.10364	4.86593	10.0302
18.5	3.22032	3.22032	3.84077	2.71605	3.84077	8.6836	3.19683	3.19683	8.6836	7.06062	5.7757	1.86319	5.7757	7.06062
18.75	3.29939	3.29939	3.75342	2.7195	3.75342	8.15079	3.19738	3.19738	8.15079	4.94359	6.05964	3.04046	6.05964	4.94359
19	3.38676	3.38676	3.67055	2.72255	3.67055	7.67875	3.19214	3.19214	7.67875	4.63123	7.45507	4.93044	7.45507	4.63123
19.25	3.48527	3.48527	3.59513	2.72523	3.59513	7.25664	3.18321	3.18321	7.25664	7.09444	8.15948	5.49518	8.15948	7.09444
19.5	3.59188	3.59188	3.52577	2.72761	3.52577	6.88148	3.17205	3.17205	6.88148	11.7479	5.7902	3.59953	5.7902	11.7479
19.75	3.7126	3.7126	3.46139	2.7297	3.46139	6.54587	3.16079	3.16079	6.54587	14.6624	4.12856	2.61371	4.12856	14.6624
20	3.84767	3.84767	3.40302	2.73156	3.40302	6.24485	3.14777	3.14777	6.24485	15.6426	3.54128	1.95633	3.54128	15.6426
20.25	3.99652	3.99652	3.34791	2.73321	3.34791	5.9737	3.13456	3.13456	5.9737	15.5172	3.43773	1.78171	3.43773	15.5172
20.5	4.16601	4.16601	3.297	2.73466	3.297	5.73318	3.12138	3.12138	5.73318	14.8341	3.71964	1.9179	3.71964	14.8341
20.75	4.35502	4.35502	3.24946	2.73628	3.24946	5.51048	3.10841	3.10841	5.51048	13.9292	3.85107	2.06605	3.85107	13.9292
21	4.56788	4.56788	3.20554	2.73742	3.20554	5.30952	3.09571	3.09571	5.30952	12.983	3.9032	2.18676	3.9032	12.983
21.25	4.80514	4.80514	3.16369	2.73844	3.16369	5.12709	3.08336	3.08336	5.12709	12.0789	3.90854	2.2824	3.90854	12.0789
21.5	5.07484	5.07484	3.12441	2.73932	3.12441	4.96067	3.07138	3.07138	4.96067	11.2477	3.88984	2.35804	3.88984	11.2477
21.75	5.3768	5.3768	3.08724	2.7401	3.08724	4.8082	3.0598	3.0598	4.8082	10.4993	3.85816	2.41823	3.85816	10.4993
22	5.71453	5.71453	3.05175	2.74077	3.05175	4.6679	3.0486	3.0486	4.6679	9.83094	3.8199	2.46652	3.8199	9.83094
22.25	6.08598	6.08598	3.0181	2.74134	3.0181	4.54285	3.03779	3.03779	4.54285	9.23542	3.77884	2.50565	3.77884	9.23542
22.5	6.4877	6.4877	2.98549	2.74182	2.98549	4.42308	3.02735	3.02735	4.42308	8.70473	3.73718	2.53767	3.73718	8.70473
22.75	6.89987	6.89987	2.95404	2.74221	2.95404	4.31349	3.01726	3.01726	4.31349	8.23385	3.69617	2.56412	3.69617	8.23385
23	7.27867	7.27867	2.92355	2.74251	2.92355	4.21261	3.00752	3.00752	4.21261	7.80947	3.65652	2.58619	3.65652	7.80947
23.25	7.53223	7.53223	2.89385	2.74273	2.89385	4.11923	2.9981	2.9981	4.11923	7.42959	3.61981	2.60474	3.61981	7.42959
23.5	7.48718	7.48718	2.86479	2.74288	2.86479	4.03239	2.98898	2.98898	4.03239	7.08798	3.58375	2.62047	3.58375	7.08798
23.75	6.87153	6.87153	2.83626	2.74295	2.83626	3.95128	2.98015	2.98015	3.95128	6.77955	3.54972	2.63391	3.54972	6.77955
24	5.42374	5.42374	2.80814	2.74294	2.80814	3.87832	2.9716	2.9716	3.87832	6.50011	3.51763	2.64546	3.51763	6.50011
24.25	3.44436	3.44436	2.80079	2.74286	2.80079	3.80796	2.96329	2.96329	3.80796	6.24561	3.48742	2.65547	3.48742	6.24561
24.5	3.34841	3.34841	2.83032	2.7427	2.83032	3.74284	2.95522	2.95522	3.74284	6.01869	3.45894	2.66418	3.45894	6.01869
24.75	5.32	5.32	2.86037	2.74247	2.86037	3.68216	2.94737	2.94737	3.68216	5.80536	3.43208	2.67181	3.43208	5.80536
25	6.81843	6.81843	2.89107	2.74216	2.89107	3.62525	2.93972	2.93972	3.62525	5.61087	3.40672	2.67853	3.40672	5.61087
ESI 4: Maximum surface tractions (Maxf) applied to each bacterial cell (ellipsoid body) of chains of 2, 3, 4, and 5 cells over time
